# Supplementary material for: Two-photon sensitized visible and near-IR luminescence of lanthanide complexes using a fluorene-based donor–π-acceptor diketonate
Source: Royal Society of Chemistry journal article supplement (doi:10.1039/c4dt01507j), 2014-08-08
Supplement: c4dt01507j1.pdf [file c4dt01507j1.pdf]

## Supporting Information

### Two-photon sensitized visible and near-IR luminescence of lanthanide complexes using a fluorene based donor- $\pi$ -acceptor diketonate

Adam W. Woodward<sup>†</sup>, Andrew Frazer<sup>†</sup>, Alma R. Morales<sup>†</sup>, Jin Yu<sup>†</sup>, Anthony F. Moore<sup>†</sup>,  
Andres D. Campiglia<sup>†</sup>, Evgheni V. Jucov<sup>§</sup>, Tatiana Timofeeva<sup>§</sup>, and Kevin D. Belfield<sup>†‡\*</sup>

<sup>†</sup>*Department of Chemistry and* <sup>‡</sup>*CREOL, College of Optics and Photonics, University of Central Florida, Orlando, FL 32816-2366, USA. Fax: 4078232252; Tel: 4078231028;*  
<sup>§</sup>*Department of Biology and Chemistry, New Mexico Highlands University, Las Vegas, New Mexico, 87701, USA*

\* To whom correspondence should be addressed Tel: (407) 823-1028.

Fax: (407) 823-2252 E-mail: [belfield@ucf.edu](mailto:belfield@ucf.edu).

| <b>Table of Contents</b>                       | <b>Pages</b> |
|------------------------------------------------|--------------|
| <sup>1</sup> H and <sup>13</sup> C NMR spectra | S2-S4        |
| HRMS                                           | S5-10        |
| IR spectra                                     | S10          |
| Fluorescence lifetimes                         | S11          |
| Bond Lengths for Ligand <b>1</b>               | S11-S12      |
| Bond Angles for Ligand <b>1</b>                | S12-S13      |

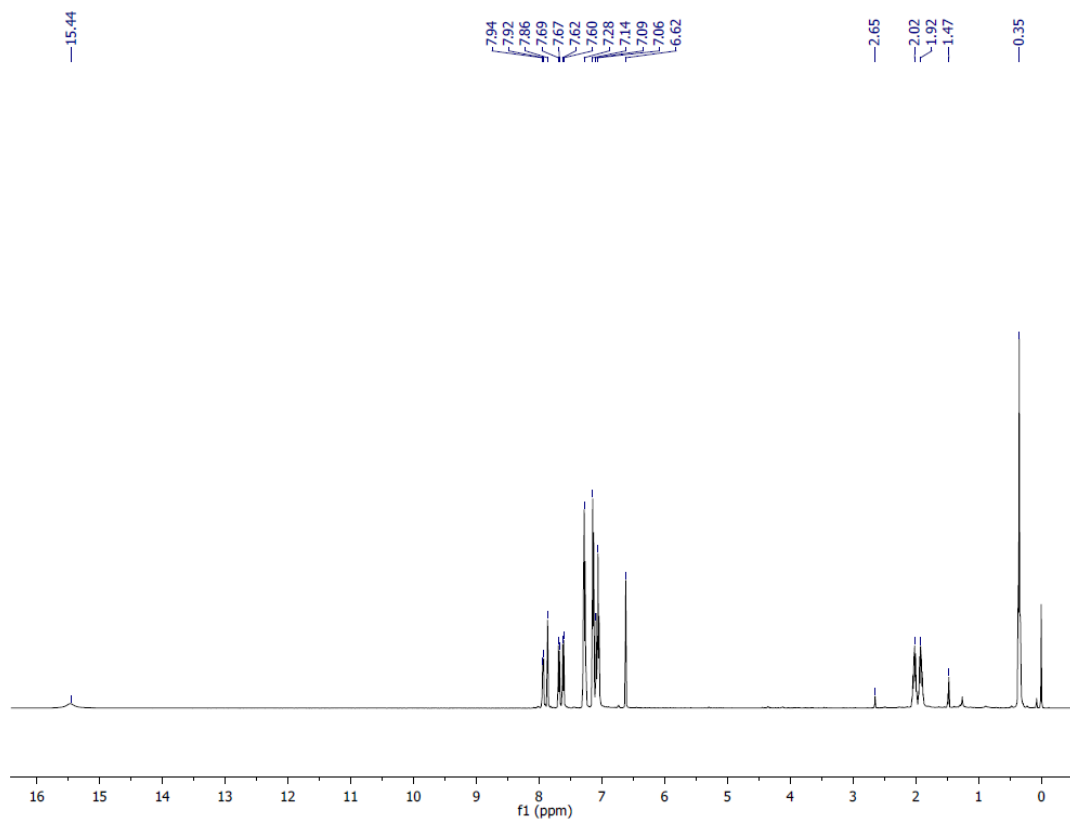

Figure S1.  $^1\text{H}$  NMR of **1**.

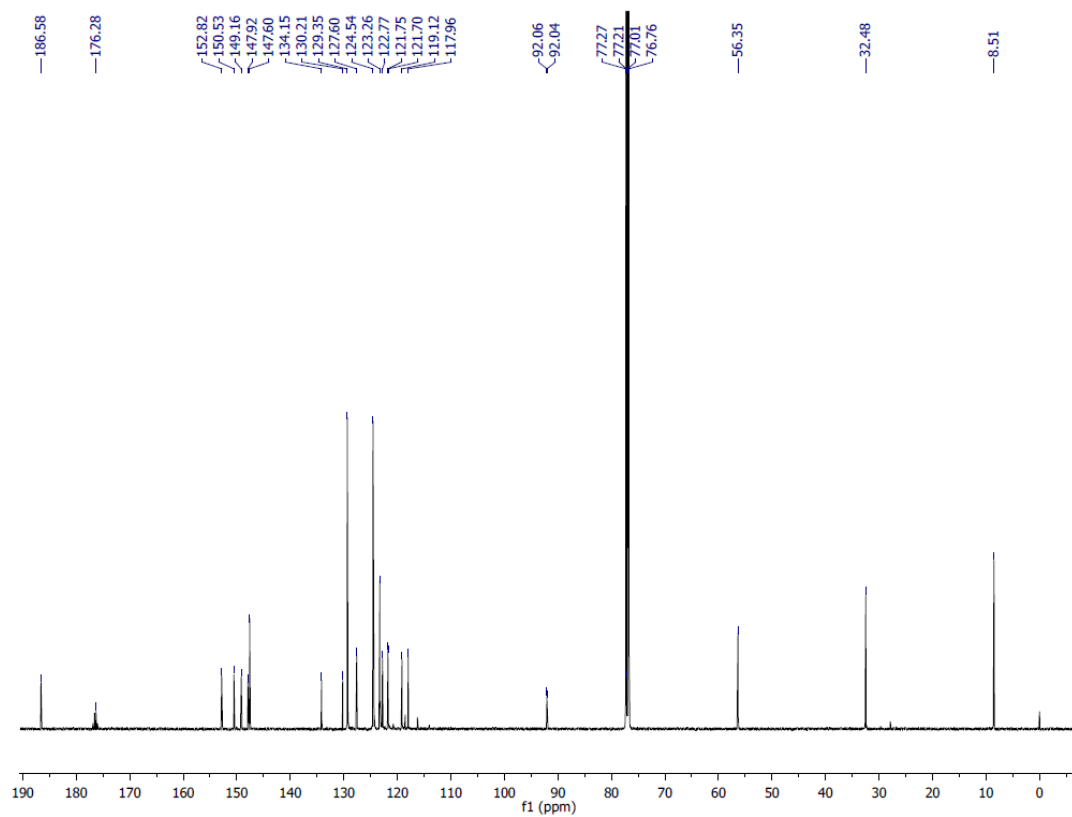

Figure S2.  $^{13}\text{C}$  NMR of **1**.

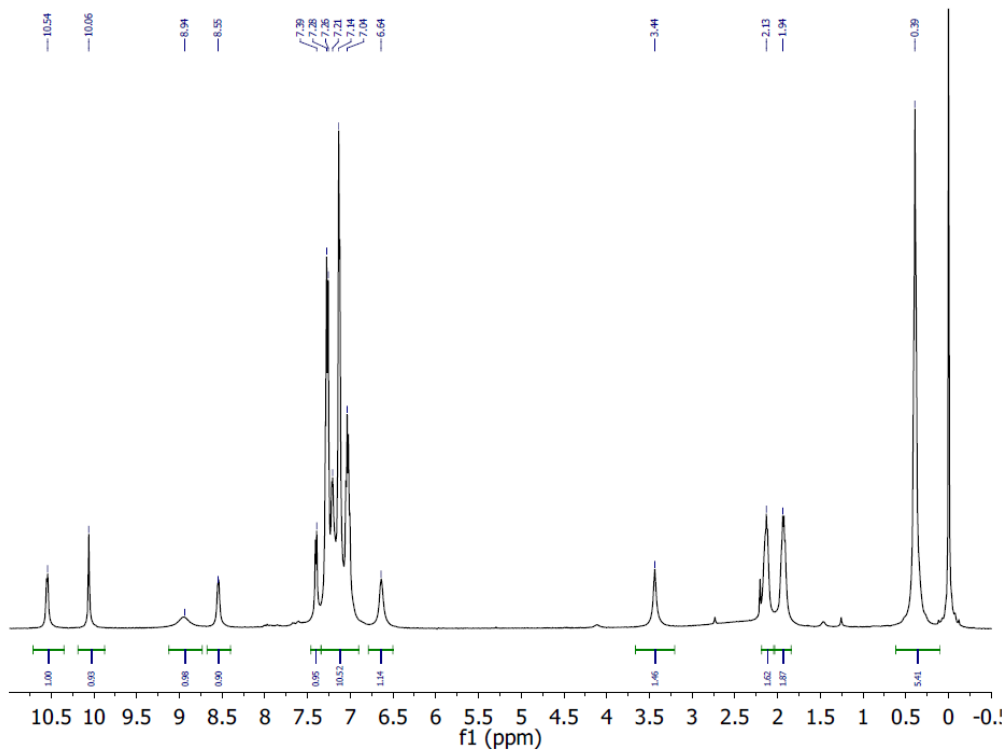

Figure S3.  $^1\text{H}$  NMR of 2-Eu.

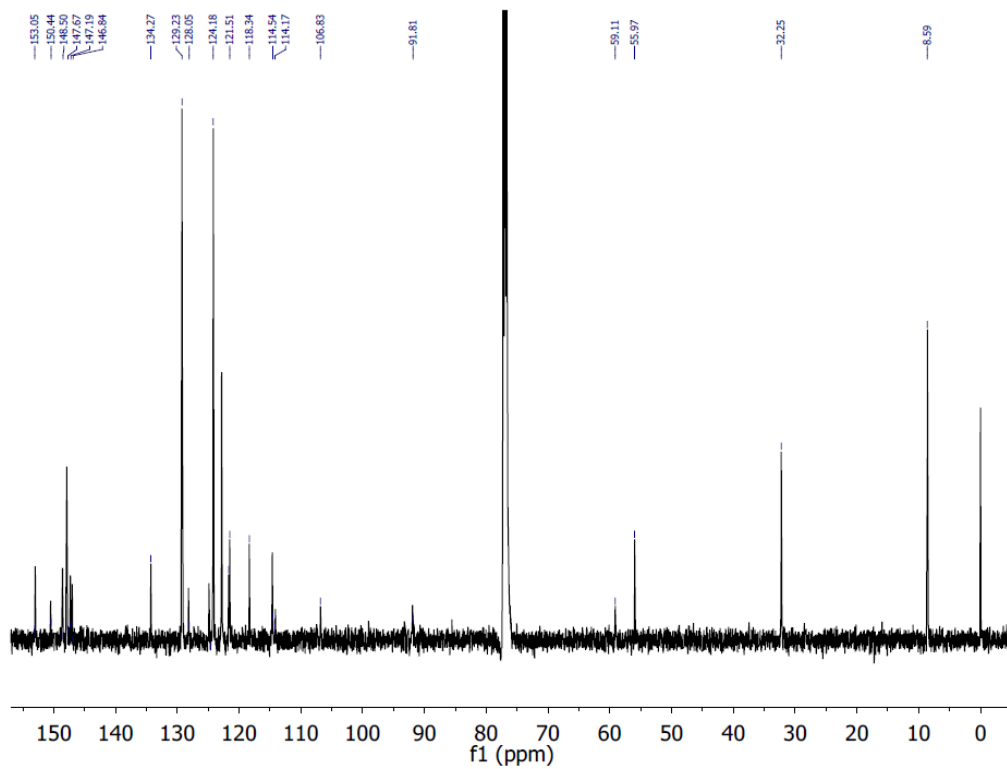

Figure S4.  $^{13}\text{C}$  NMR of 2-Eu.

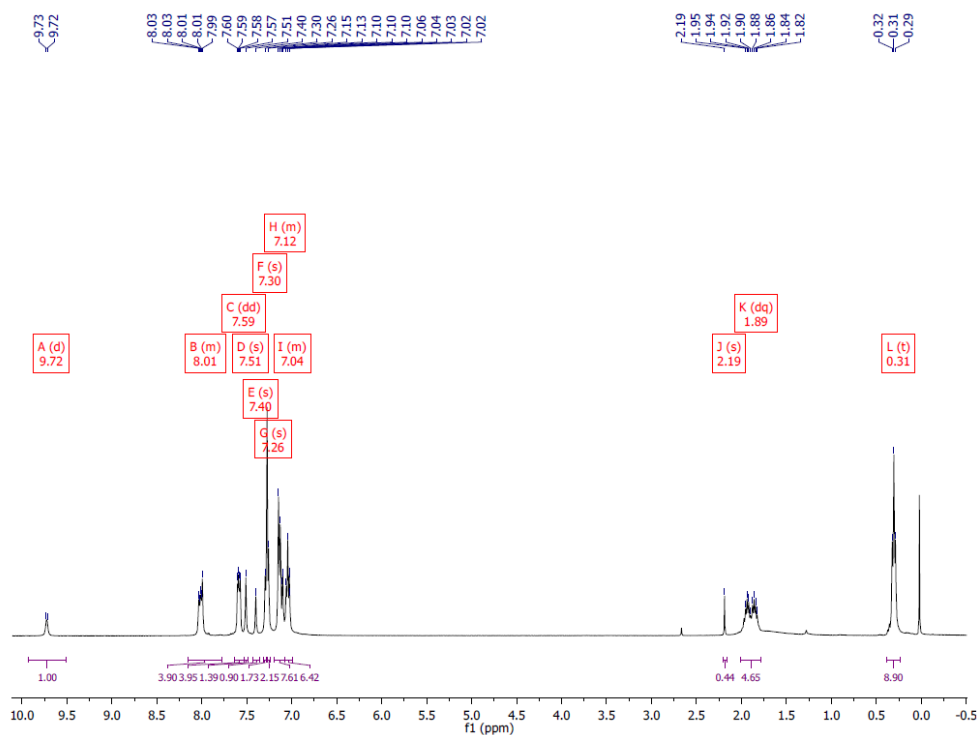

Figure S5.  $^1\text{H}$  NMR of 2-Sm.

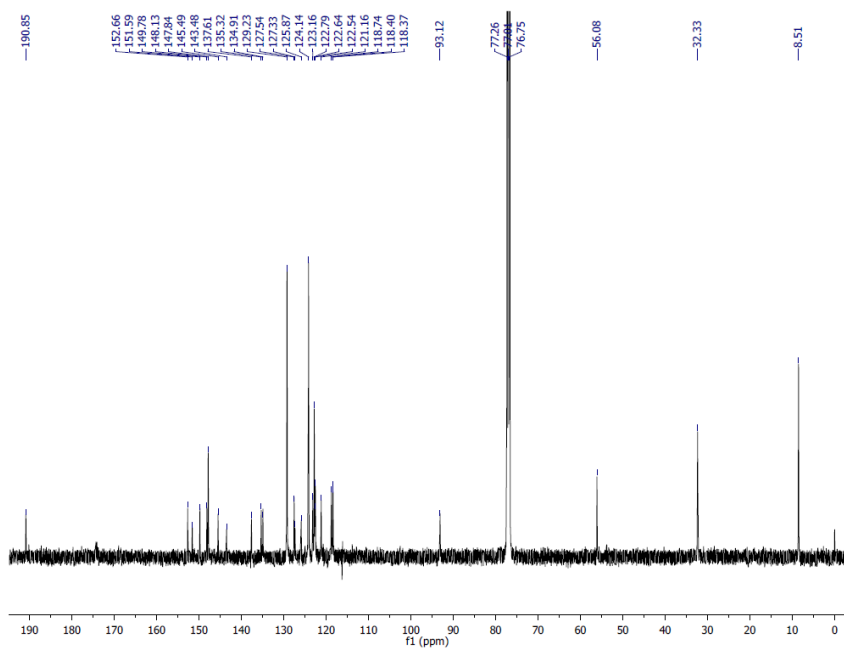

Figure S6.  $^{13}\text{C}$  NMR of 2-Sm.

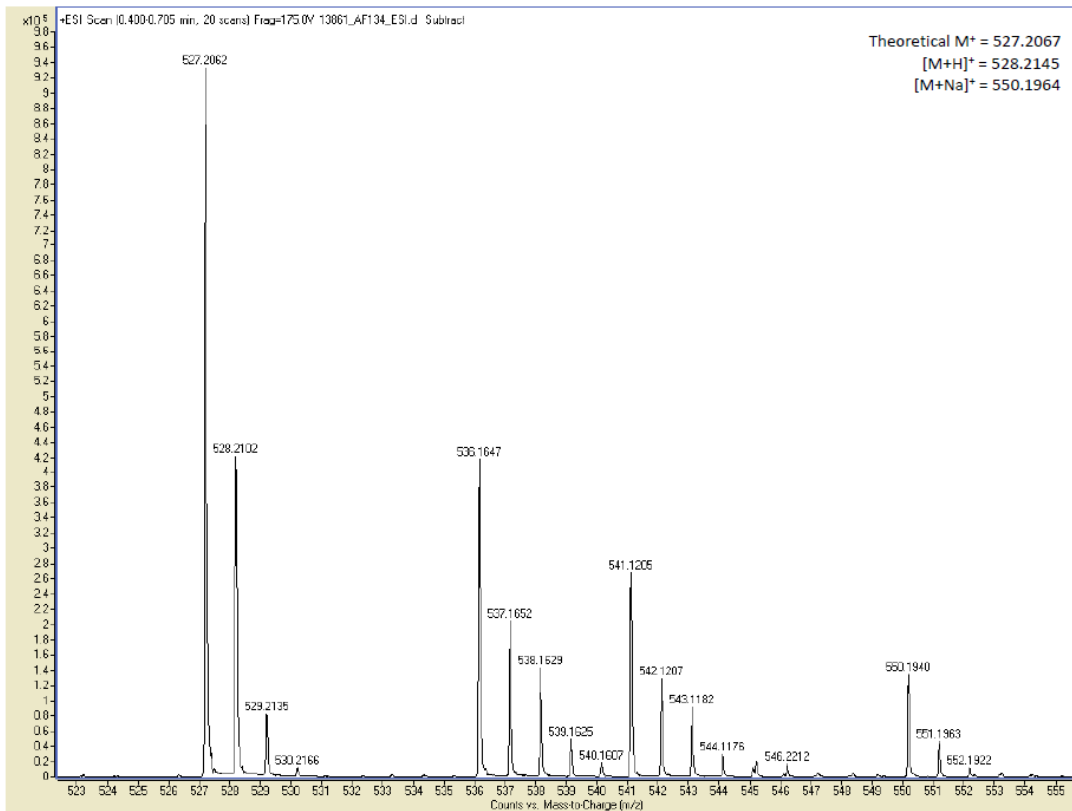

Figure S7. HRMS of 1.

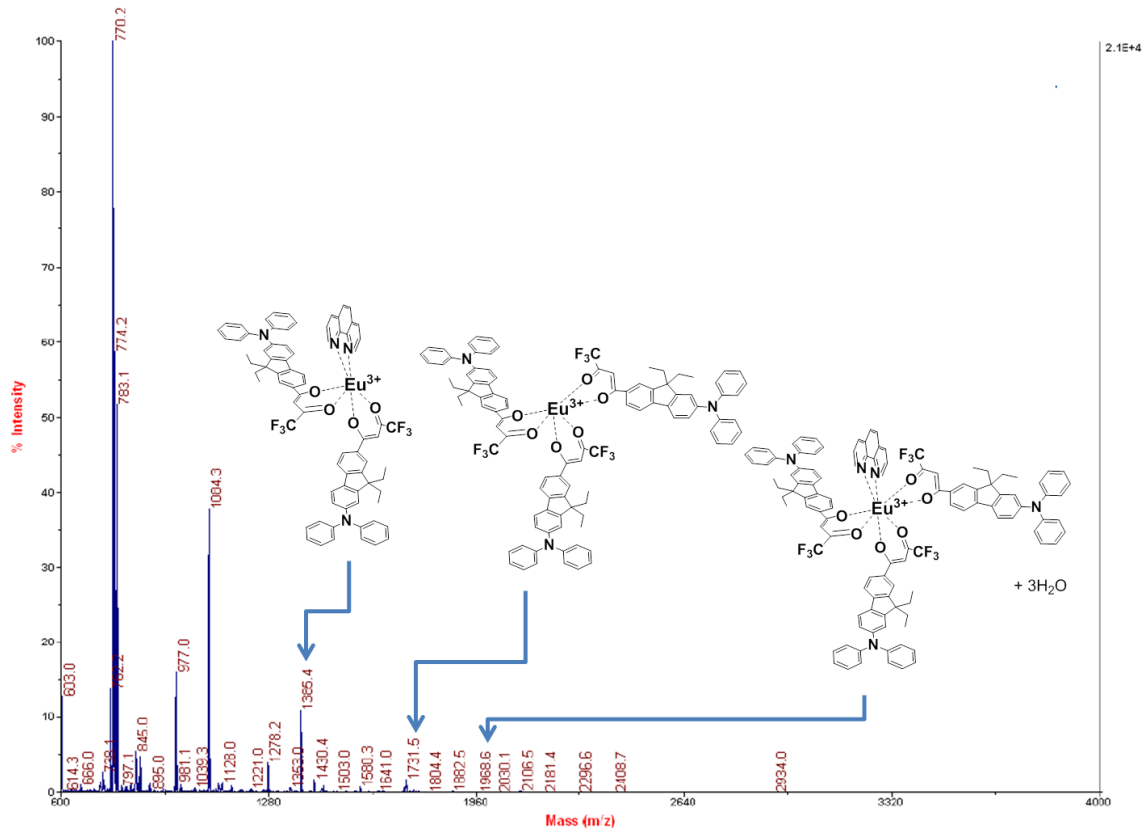

Figure S8. HRMS of 2-Eu.

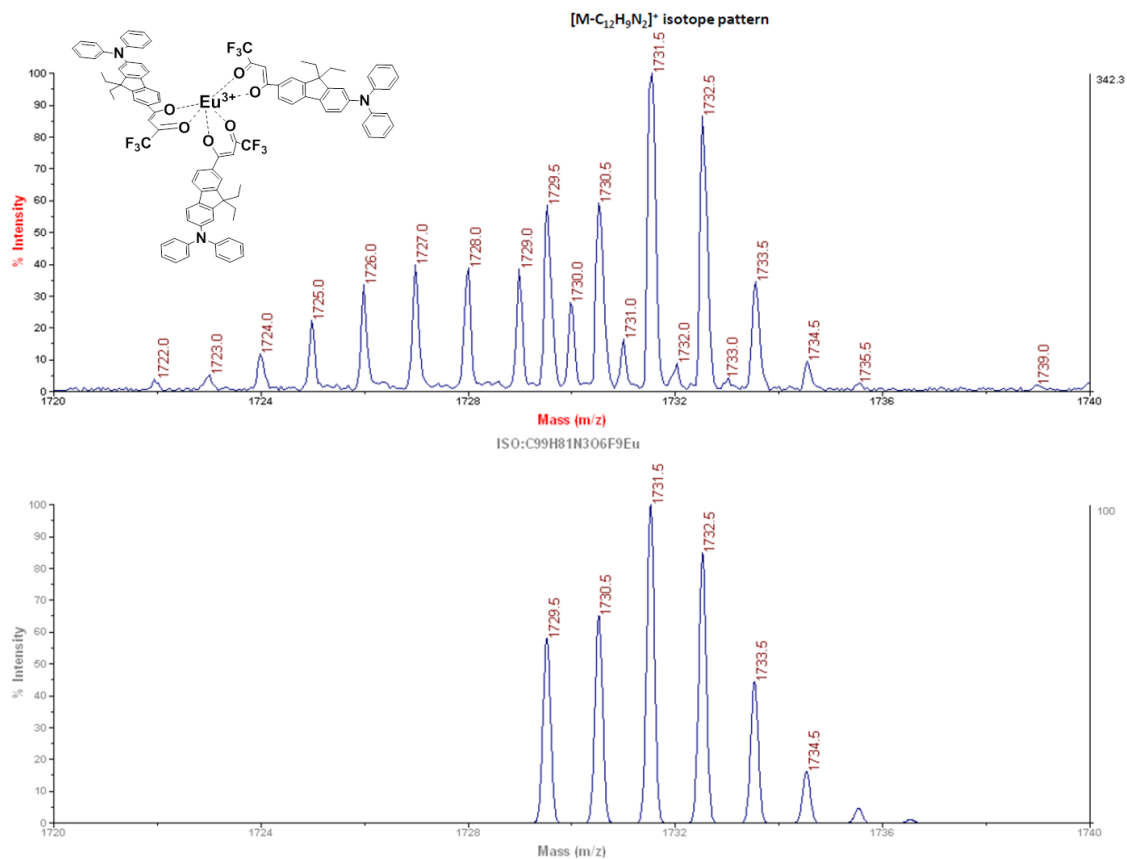

**Figure S9.** Actual (top) and theoretical (bottom) isotopic distributions for the  $m/z = 1731.5$  fragment of **2-Eu**.

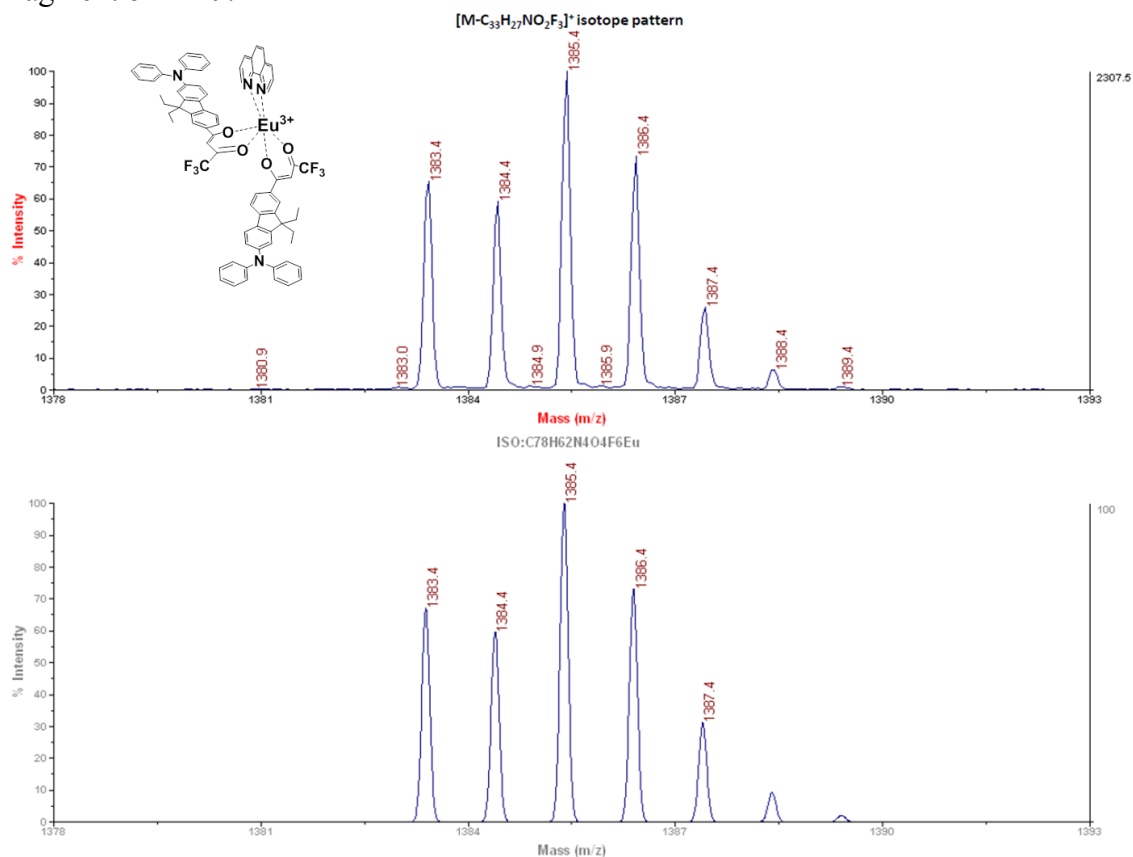

**Figure S10.** Actual (top) and theoretical (bottom) isotopic distributions for the  $m/z = 1385.4$  fragment of **2-Eu**.

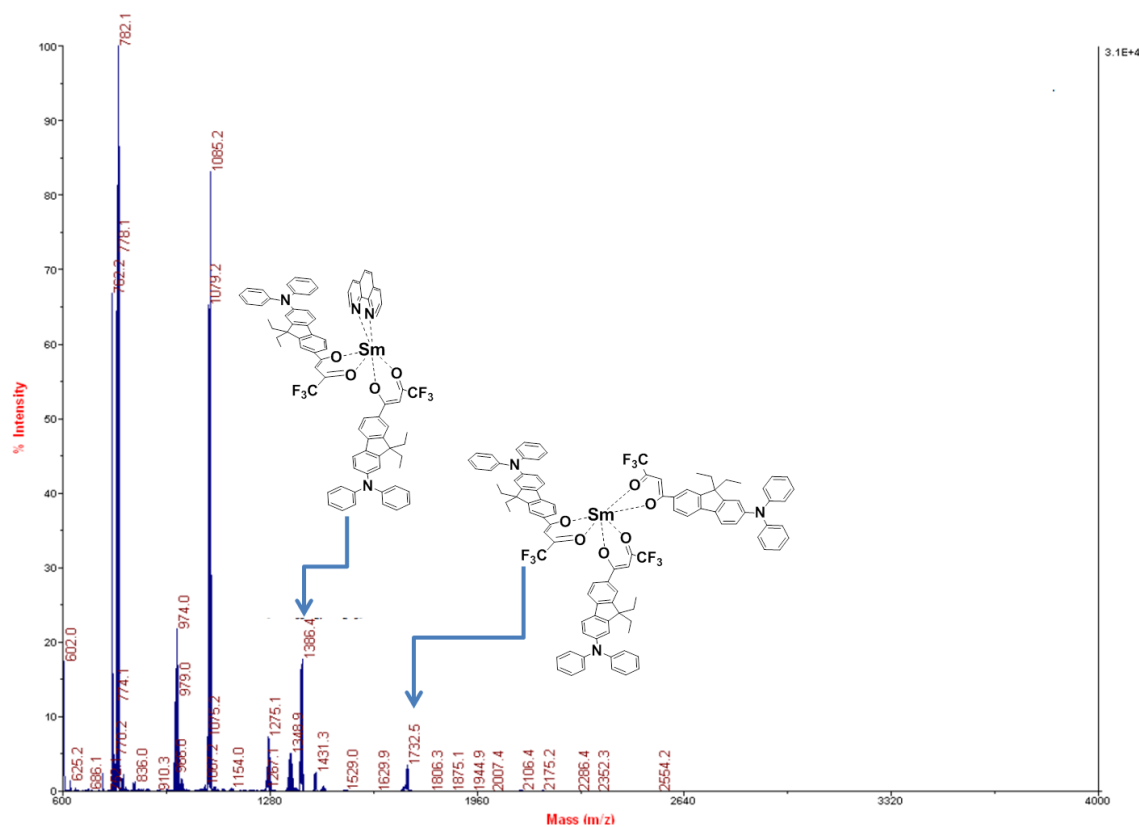

Figure S11. HRMS of 2-Sm.

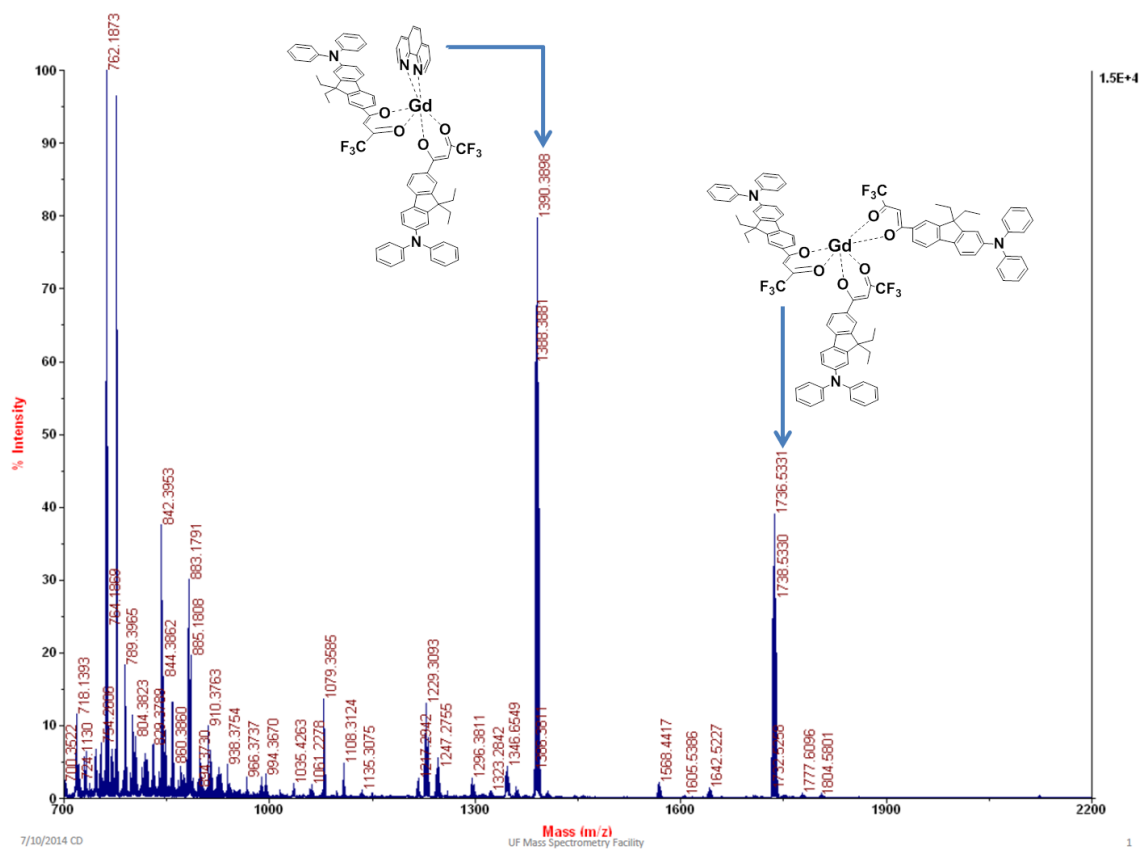

Figure S12. HRMS of 2-Gd.

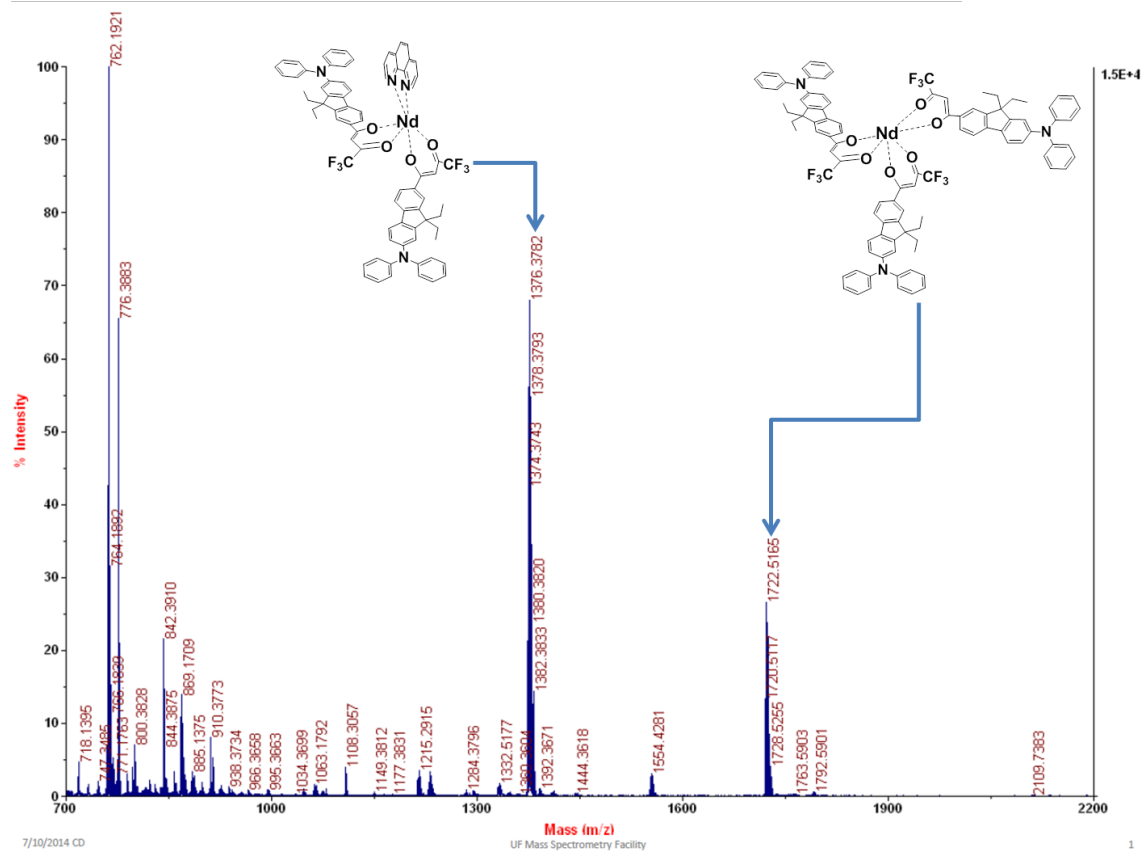

Figure S13. HRMS of 2-Nd.

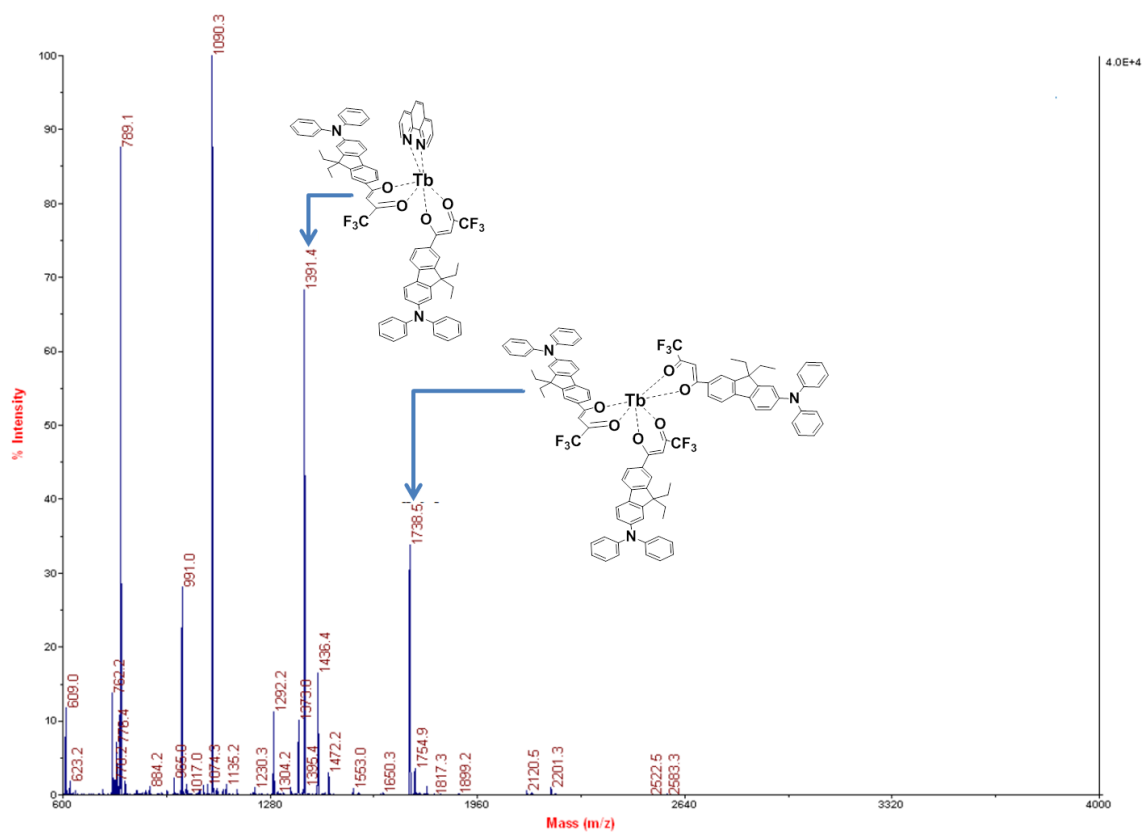

Figure S14. HRMS of 2-Tb.



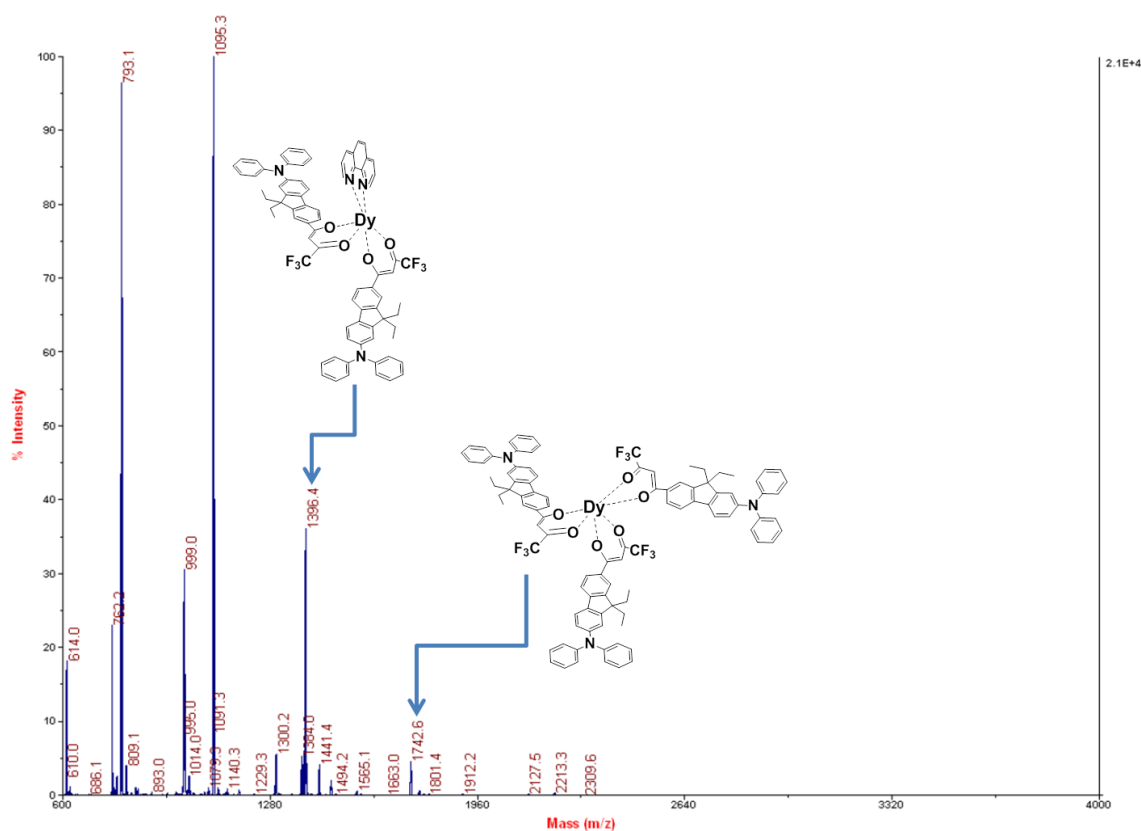

Figure S15. HRMS of 2-Dy.

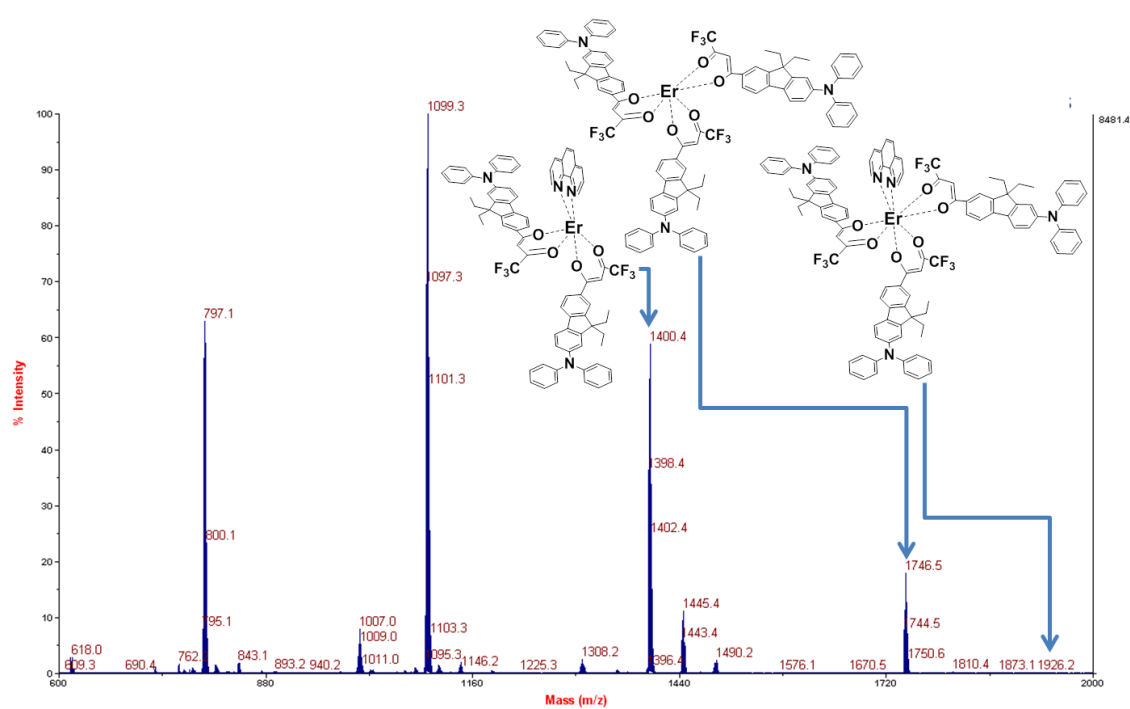

Figure S16. HRMS of 2-Er.

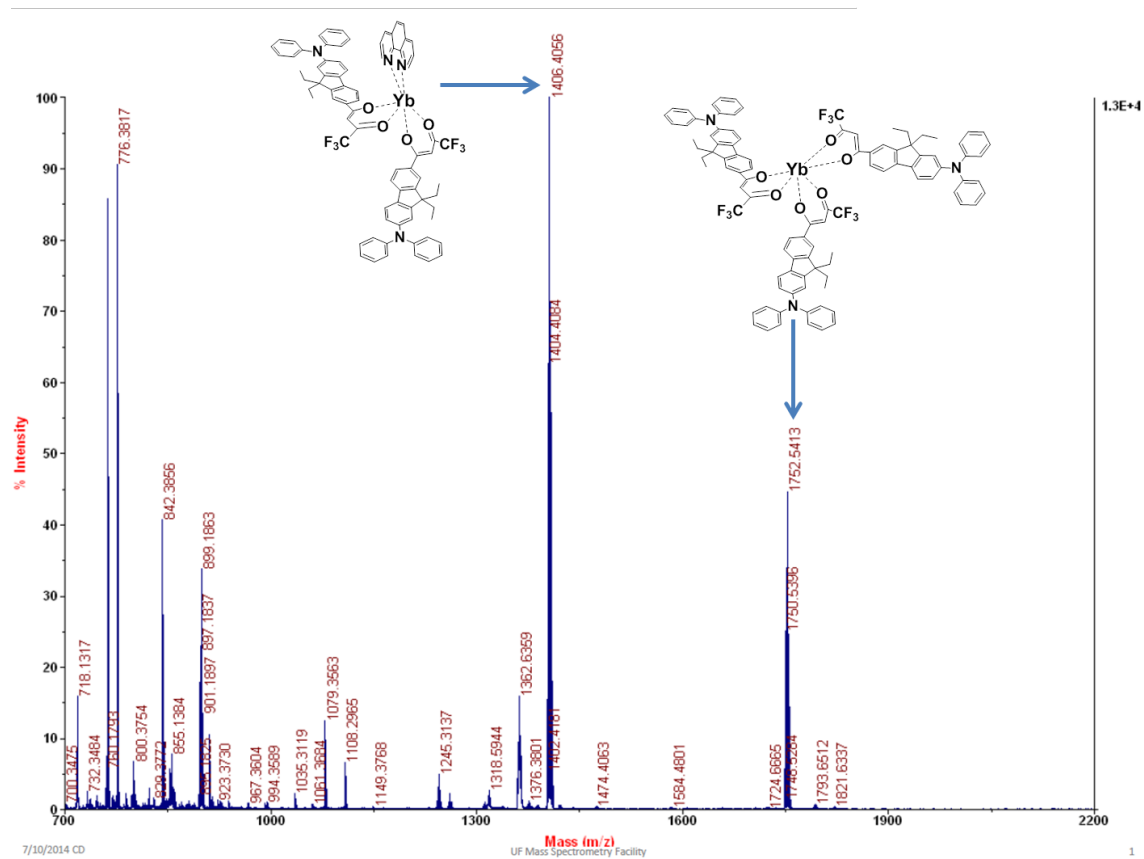

Figure S17. HRMS of 2-Yb.

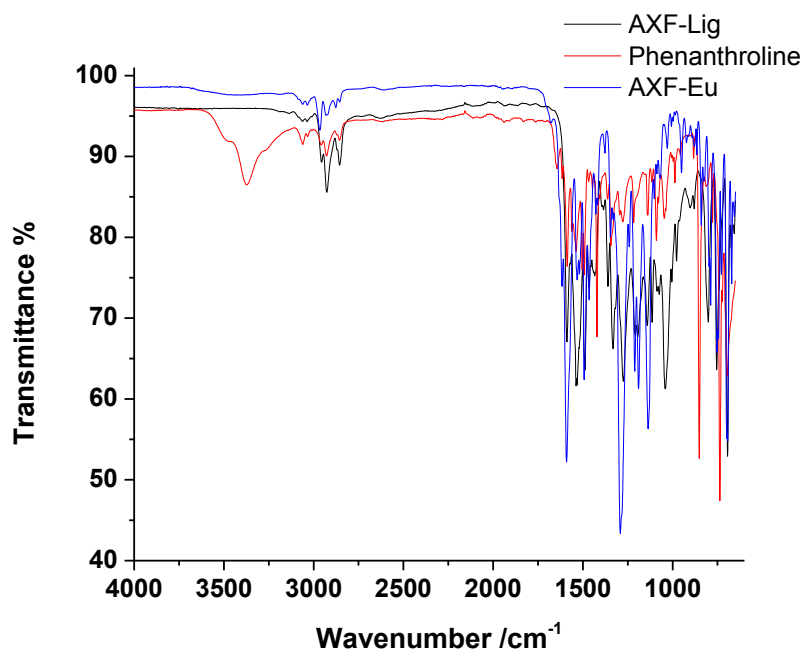

Figure S18. IR spectra of phenanthroline, 1, and 2-Eu.

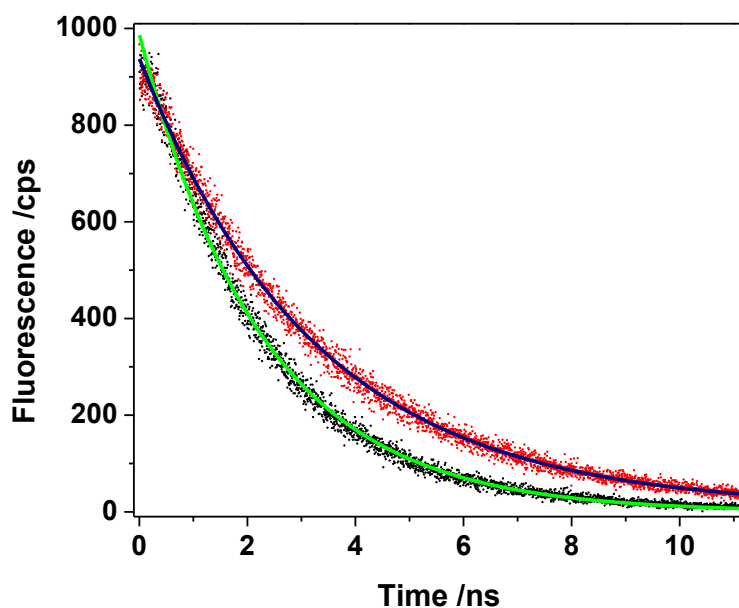

**Figure S19.** Fluorescence decay curves for the ligand **1** in cyclohexane and THF (black points and red points, respectively), and their respective fitted exponential functions.

**Table S8. Bond Lengths for Ligand 1.**

| Atom | Atom | Length/Å  | Atom | Atom | Length/Å  |
|------|------|-----------|------|------|-----------|
| F1   | C33  | 1.354(17) | C8   | C9   | 1.388(8)  |
| F2   | C33  | 1.27(2)   | C8   | C13  | 1.398(8)  |
| F3   | C33  | 1.347(17) | C9   | C10  | 1.370(8)  |
| F1'  | C33  | 1.26(2)   | C10  | C11  | 1.414(8)  |
| F2'  | C33  | 1.20(2)   | C11  | C12  | 1.382(8)  |
| F3'  | C33  | 1.54(2)   | C12  | C13  | 1.395(8)  |
| O1   | C32  | 1.254(11) | C14  | C15  | 1.523(12) |
| O2   | C30  | 1.314(10) | C16  | C17  | 1.523(10) |
| N1   | C11  | 1.404(8)  | C18  | C19  | 1.377(9)  |
| N1   | C18  | 1.428(8)  | C18  | C23  | 1.386(9)  |
| N1   | C24  | 1.433(8)  | C19  | C20  | 1.372(10) |
| C1   | C2   | 1.523(9)  | C20  | C21  | 1.365(11) |
| C1   | C13  | 1.512(9)  | C21  | C22  | 1.359(11) |
| C1   | C14  | 1.546(11) | C22  | C23  | 1.394(10) |
| C1   | C16  | 1.558(10) | C24  | C25  | 1.366(9)  |
| C2   | C3   | 1.388(9)  | C24  | C29  | 1.384(9)  |
| C2   | C7   | 1.391(8)  | C25  | C26  | 1.372(10) |
| C3   | C4   | 1.404(9)  | C26  | C27  | 1.353(12) |
| C4   | C5   | 1.406(9)  | C27  | C28  | 1.354(12) |
| C4   | C30  | 1.447(10) | C28  | C29  | 1.390(11) |
| C5   | C6   | 1.388(8)  | C30  | C31  | 1.375(10) |

|    |    |          |     |     |           |
|----|----|----------|-----|-----|-----------|
| C6 | C7 | 1.394(8) | C31 | C32 | 1.356(11) |
| C7 | C8 | 1.459(8) | C32 | C33 | 1.528(16) |

**Table S9. Bond Angles for Ligand 1.**

| Atom | Atom | Atom | Angle/°  | Atom | Atom | Atom | Angle/°   |
|------|------|------|----------|------|------|------|-----------|
| C11  | N1   | C18  | 118.9(5) | C22  | C21  | C20  | 120.5(8)  |
| C11  | N1   | C24  | 120.6(6) | C21  | C22  | C23  | 120.6(8)  |
| C18  | N1   | C24  | 119.6(6) | C18  | C23  | C22  | 119.2(8)  |
| C2   | C1   | C14  | 111.9(6) | C25  | C24  | N1   | 121.8(7)  |
| C2   | C1   | C16  | 110.8(6) | C25  | C24  | C29  | 119.4(7)  |
| C13  | C1   | C2   | 100.6(5) | C29  | C24  | N1   | 118.8(7)  |
| C13  | C1   | C14  | 112.5(6) | C24  | C25  | C26  | 119.5(8)  |
| C13  | C1   | C16  | 110.7(6) | C27  | C26  | C25  | 122.0(9)  |
| C14  | C1   | C16  | 110.0(7) | C26  | C27  | C28  | 119.0(9)  |
| C3   | C2   | C1   | 127.3(6) | C27  | C28  | C29  | 120.8(9)  |
| C3   | C2   | C7   | 121.4(6) | C24  | C29  | C28  | 119.3(8)  |
| C7   | C2   | C1   | 111.3(6) | O2   | C30  | C4   | 114.6(8)  |
| C2   | C3   | C4   | 119.0(7) | O2   | C30  | C31  | 117.1(7)  |
| C3   | C4   | C5   | 119.5(6) | C31  | C30  | C4   | 128.2(9)  |
| C3   | C4   | C30  | 120.2(8) | C32  | C31  | C30  | 123.6(9)  |
| C5   | C4   | C30  | 120.3(7) | O1   | C32  | C31  | 123.9(9)  |
| C6   | C5   | C4   | 120.7(6) | O1   | C32  | C33  | 119.0(10) |
| C5   | C6   | C7   | 119.5(6) | C31  | C32  | C33  | 116.7(11) |
| C2   | C7   | C6   | 119.8(6) | F1   | C33  | F3'  | 53.3(10)  |
| C2   | C7   | C8   | 108.4(6) | F1   | C33  | C32  | 109.6(16) |
| C6   | C7   | C8   | 131.8(6) | F2   | C33  | F1   | 107.5(13) |
| C9   | C8   | C7   | 133.3(6) | F2   | C33  | F3   | 117(2)    |
| C9   | C8   | C13  | 118.5(6) | F2   | C33  | F3'  | 143.4(13) |
| C13  | C8   | C7   | 108.2(5) | F2   | C33  | C32  | 116.9(11) |
| C10  | C9   | C8   | 120.8(6) | F3   | C33  | F1   | 99.4(12)  |
| C9   | C10  | C11  | 120.6(6) | F3   | C33  | F3'  | 50.8(9)   |
| N1   | C11  | C10  | 121.2(6) | F3   | C33  | C32  | 105.4(12) |
| C12  | C11  | N1   | 119.7(6) | F1'  | C33  | F1   | 36.7(9)   |
| C12  | C11  | C10  | 119.0(6) | F1'  | C33  | F2   | 74.6(13)  |
| C11  | C12  | C13  | 119.6(6) | F1'  | C33  | F3   | 129.5(12) |
| C8   | C13  | C1   | 111.4(5) | F1'  | C33  | F3'  | 89.7(14)  |
| C12  | C13  | C1   | 127.4(6) | F1'  | C33  | C32  | 112.0(14) |
| C12  | C13  | C8   | 121.2(6) | F2'  | C33  | F1   | 128.4(14) |
| C15  | C14  | C1   | 114.2(7) | F2'  | C33  | F2   | 73.3(19)  |
| C17  | C16  | C1   | 115.2(6) | F2'  | C33  | F3   | 45.7(9)   |
| C19  | C18  | N1   | 120.7(7) | F2'  | C33  | F1'  | 131(2)    |
| C19  | C18  | C23  | 119.0(7) | F2'  | C33  | F3'  | 94.6(13)  |
| C23  | C18  | N1   | 120.3(7) | F2'  | C33  | C32  | 115.3(11) |

|     |     |     |          |     |     |     |          |
|-----|-----|-----|----------|-----|-----|-----|----------|
| C20 | C19 | C18 | 121.3(8) | C32 | C33 | F3' | 99.5(14) |
| C21 | C20 | C19 | 119.6(8) |     |     |     |          |
